# Supplementary material
Source: ML conference proceedings conference paper supplement (https://openreview.net/forum?id=doxBjZ88H3)
Supplement: supplementary_material [file ICLR_2026-submission-appendix.pdf › ICLR_2026-submission-supplementary_materials/ICLR_2026-submission-appendix.pdf]

**Reproducibility statement** Complete source code for computing the information gap, implementing both likelihood and posterior decoders, and running all simulation experiments is available as part of the supplementary materials to facilitate the review process. Upon acceptance, all code will be released publicly to facilitate experimental design and reproducibility. The detailed derivation of information gap, including assumptions and complete proofs, is presented in Appendix A.1. This enables verification of the theoretical claims and adaptation to related problems. The details of simulation experiments including synthetic neural population response generation procedures, deep neural network decoder architectures and hyperparameters, and training procedures are presented in Appendix A.2.

## REFERENCES

- Laurence Aitchison, Jannes Jegminat, Jorge Aurelio Menendez, Jean-Pascal Pfister, Alexandre Pouget, and Peter E Latham. Synaptic plasticity as bayesian inference. *Nature neuroscience*, 24(4):565–571, 2021.
- David Alais and David Burr. The ventriloquist effect results from near-optimal bimodal integration. *Current biology*, 14(3):257–262, 2004.
- Jeffrey M Beck, Wei Ji Ma, Roozbeh Kiani, Tim Hanks, Anne K Churchland, Jamie Roitman, Michael N Shadlen, Peter E Latham, and Alexandre Pouget. Probabilistic population codes for bayesian decision making. *Neuron*, 60(6):1142–1152, 2008.
- Pietro Berkes, Gergő Orbán, Máté Lengyel, and József Fiser. Spontaneous cortical activity reveals hallmarks of an optimal internal model of the environment. *Science*, 331(6013):83–87, 2011.
- Pierre Simon de Laplace. *Théorie analytique des probabilités*, volume 7. Courcier, 1820.
- Marc O Ernst and Martin S Banks. Humans integrate visual and haptic information in a statistically optimal fashion. *Nature*, 415(6870):429–433, 2002.
- Dylan Festa, Amir Aschner, Aida Davila, Adam Kohn, and Ruben Coen-Cagli. Neuronal variability reflects probabilistic inference tuned to natural image statistics. *Nature communications*, 12(1):3635, 2021.
- József Fiser, Pietro Berkes, Gergő Orbán, and Máté Lengyel. Statistically optimal perception and learning: from behavior to neural representations. *Trends in cognitive sciences*, 14(3):119–130, 2010.
- Robbe LT Goris, J Anthony Movshon, and Eero P Simoncelli. Partitioning neuronal variability. *Nature neuroscience*, 17(6):858–865, 2014.
- Agnieszka Grabska-Barwinska, Jeff Beck, Alexandre Pouget, and Peter Latham. Demixing odors-fast inference in olfaction. *Advances in Neural Information Processing Systems*, 26, 2013.
- Ralf M Haefner, Pietro Berkes, and József Fiser. Perceptual decision-making as probabilistic inference by neural sampling. *Neuron*, 90(3):649–660, 2016.
- Ralf M Haefner, Jeff Beck, Cristina Savin, Mehrdad Salmasi, and Xaq Pitkow. How does the brain compute with probabilities? *arXiv preprint arXiv:2409.02709*, 2024.
- H von Helmholtz. Versuch einer erweiterten anwendung des fechnerschen gesetzes im farbensystem. *Z. Psychol. Physiol. Sinnesorg*, 2:1–30, 1891.
- Patrik Hoyer and Aapo Hyvärinen. Interpreting neural response variability as monte carlo sampling of the posterior. *Advances in neural information processing systems*, 15, 2002.
- Mehrdad Jazayeri and J Anthony Movshon. Optimal representation of sensory information by neural populations. *Nature neuroscience*, 9(5):690–696, 2006.
- Daniel Kersten, Pascal Mamassian, and Alan Yuille. Object perception as bayesian inference. *Annu. Rev. Psychol.*, 55(1):271–304, 2004.

- David C Knill and Alexandre Pouget. The bayesian brain: the role of uncertainty in neural coding and computation. *TRENDS in Neurosciences*, 27(12):712–719, 2004.
- David C Knill and Whitman Richards. *Perception as Bayesian inference*. Cambridge University Press, 1996.
- Konrad P Körding and Daniel M Wolpert. Bayesian integration in sensorimotor learning. *Nature*, 427(6971):244–247, 2004.
- Richard D Lange and Ralf M Haefner. Task-induced neural covariability as a signature of approximate bayesian learning and inference. *PLoS computational biology*, 18(3):e1009557, 2022.
- Richard D Lange, Sabyasachi Shivkumar, Ankani Chattoraj, and Ralf M Haefner. Bayesian encoding and decoding as distinct perspectives on neural coding. *Nature neuroscience*, 26(12):2063–2072, 2023.
- Wei Ji Ma and Mehrdad Jazayeri. Neural coding of uncertainty and probability. *Annual review of neuroscience*, 37(1):205–220, 2014.
- Wei Ji Ma, Jeffrey M Beck, Peter E Latham, and Alexandre Pouget. Bayesian inference with probabilistic population codes. *Nature neuroscience*, 9(11):1432–1438, 2006.
- Gergő Orbán, Pietro Berkes, József Fiser, and Máté Lengyel. Neural variability and sampling-based probabilistic representations in the visual cortex. *Neuron*, 92(2):530–543, 2016.
- Adam Paszke, Sam Gross, Francisco Massa, Adam Lerer, James Bradbury, Gregory Chanan, Trevor Killeen, Zeming Lin, Natalia Gimelshein, Luca Antiga, et al. Pytorch: An imperative style, high-performance deep learning library. *Advances in neural information processing systems*, 32, 2019.
- Alexandre Pouget, Jeffrey M Beck, Wei Ji Ma, and Peter E Latham. Probabilistic brains: knowns and unknowns. *Nature neuroscience*, 16(9):1170–1178, 2013.
- Ahmad T Qamar, R James Cotton, Ryan G George, Jeffrey M Beck, Eugenia Prezhdo, Allison Laudano, Andreas S Tolias, and Wei Ji Ma. Trial-to-trial, uncertainty-based adjustment of decision boundaries in visual categorization. *Proceedings of the National Academy of Sciences*, 110(50):20332–20337, 2013.
- Allan Raventós, Mansheej Paul, Feng Chen, and Surya Ganguli. Pretraining task diversity and the emergence of non-bayesian in-context learning for regression. *Advances in neural information processing systems*, 36:14228–14246, 2023.
- Sabyasachi Shivkumar, Richard Lange, Ankani Chattoraj, and Ralf Haefner. A probabilistic population code based on neural samples. *Advances in neural information processing systems*, 31, 2018.
- Suhas Shrinivasan, Konstantin-Klemens Lurz, Kelli Restivo, George Denfield, Andreas Tolias, Edgar Walker, and Fabian Sinz. Taking the neural sampling code very seriously: A data-driven approach for evaluating generative models of the visual system. *Advances in Neural Information Processing Systems*, 36:21945–21959, 2023.
- Edgar Y Walker, R James Cotton, Wei Ji Ma, and Andreas S Tolias. A neural basis of probabilistic computation in visual cortex. *Nature Neuroscience*, 23(1):122–129, 2020.
- Yair Weiss, Eero P Simoncelli, and Edward H Adelson. Motion illusions as optimal percepts. *Nature neuroscience*, 5(6):598–604, 2002.
- Tianming Yang and Michael N Shadlen. Probabilistic reasoning by neurons. *Nature*, 447(7148):1075–1080, 2007.

## A TECHNICAL APPENDICES AND SUPPLEMENTARY MATERIAL

### A.1 INFORMATION GAP DERIVATION

Consider a generative model of sensory observations  $\theta \rightarrow x$ , where  $x$  is the noisy sensory observation (e.g. a drifting grating stimulus) generated according to the conditional distribution  $p(x|\theta)$ , where  $\theta$  is the hidden state of the environment (e.g. true orientation of the drifting grating stimulus). Note that the likelihood function is given by  $\mathcal{L}(\theta) \equiv p(x|\theta)$  for a specific observation  $x$ . Consider an experimental setup where there are two possible stimulus generation contexts:  $c = \{A, B\}$  with their associated context-specific latent priors  $p^c(\theta) := p(\theta|c)$  and their context frequencies  $p(c)$ .

Given a sensory observation  $x$  and a context  $c$ , the context-dependent posterior distribution of  $\theta$ , denoted as  $p^c(\theta|x) := p(\theta|x, c)$ , is given by the Baye’s rule:

$$\begin{aligned} p^c(\theta|x) &= \frac{p^c(\theta, x)}{p^c(x)} \\ &= \frac{p^c(x|\theta) \cdot p^c(\theta)}{\sum_{\theta'} p^c(x|\theta') \cdot p^c(\theta')}, \quad \text{Since the generative process } \theta \rightarrow x \text{ is independent of } c, \\ &= \frac{p(x|\theta) \cdot p^c(\theta)}{\sum_{\theta'} p(x|\theta') \cdot p^c(\theta')} \\ &\propto p(x|\theta) \cdot p^c(\theta) \end{aligned}$$

For a given neural population response vector  $\mathbf{r}$ , consider two competing probabilistic coding hypothesis:

1. **Likelihood coding hypothesis:**  $\mathbf{r}_L \sim p(x|\theta)$ , where the neural population responses  $\mathbf{r}_L$  is hypothesized to encode the likelihood function of the stimulus  $p(x|\theta)$ .
2. **Posterior coding hypothesis:**  $\mathbf{r}_P \sim p(\theta|x)$ , where the neural population response  $\mathbf{r}_P$  is hypothesized to encode the posterior distribution of the hidden state given the stimulus  $p(\theta|x)$ .

We consider whether it is possible to differentiate the probabilistic information content encoded in given neural population responses  $\mathbf{r}$  through a decoding approach. Intuitively, if a neural population is encoding the likelihood function, then a decoder decoding the likelihood function should lead to a better performance than a decoder decoding the posterior distribution; vice versa if the neural population is encoding the posterior distribution. In other words, decoder performance degrades when trying to decode mismatched probabilistic content, such that the difference in decoder performance when decoding the likelihood function versus decoding the posterior distribution can be used to differentiate whether a given neural population is encoding the likelihood function (likelihood coding hypothesis) or the posterior distribution (posterior coding hypothesis). Below, we formalize this intuition by deriving the expected decoder performance difference.

Consider applying a decoder function  $g$  which is optimized to decode some probabilistic information content from the neural population responses under cross-entropy loss:

$$g(\mathbf{r}) \rightarrow p(\cdot) \quad \text{where } g \text{ is a decoder function}$$

Note that to establish the expected difference between decoder performances, we assume ideal decoders in derivations. Empirically, we assume the decoder is expressive enough (e.g. a multi-layer perceptron, MLP) and fully trained, and the data is abundant such that the performance of the decoder would closely approximate that of the ideal decoder.

Adopting an information-theoretical approach, our goal is to derive the *expected difference* between decoder performances as measured in cross-entropy when decoding the likelihood function versus decoding the posterior distribution from given neural population responses  $\mathbf{r}$ , a quantity that we termed the *information gap*,  $\Delta^{\text{info}}$ , between the two decoders under a given experimental design specified by  $(p(c), p^c(\theta))$ ,  $\forall c \in \{A, B\}$  and a generative model  $p(x|\theta)$ . Below we will separately derive the information gap for likelihood coding hypothesis,  $\Delta_L^{\text{info}}$ , and the information gap for posterior coding hypothesis,  $\Delta_P^{\text{info}}$ , respectively. As a by-product, our information-theoretical analysis framework also allows for deriving the *expected decoder performance* for each decoder under the limit of perfect decoding as measured in cross-entropy.

### A.1.1 INFORMATION GAP FOR LIKELIHOOD CODING HYPOTHESIS $\Delta_L^{\text{INFO}}$

For a likelihood coding population, the neural population responses  $\mathbf{r}_L$  encode the likelihood function of the sensory stimulus, which are not modulated by and hence independent of the context prior.

$$\mathbf{r}_L \sim f(p(x|\theta)), \text{ where } f \text{ is some neural encoding function.}$$

Note that since the decoders are optimized under cross-entropy loss:

$$H(p, q) = -\mathbb{E}_p[\log q] = H(p) + D_{\text{KL}}(p || q)$$

when  $q^* = p \Leftrightarrow H(p, q^*)$  is minimized.

#### Decoding performance of a perfect likelihood decoder $g_L$

Applying a likelihood decoder  $g_L$  to a likelihood coding population  $\mathbf{r}_L$ , we want

$$g_L(\mathbf{r}_L) \longrightarrow p(x|\theta)$$

Let us assume the observation space can be discretized into  $x \in \{x_i\}$ , and consider the neural population responses associated with each  $x_i$ :

$$\forall x_i, c : \mathbf{r}_{L,i}^c = \mathbf{r}_{L,i} \sim f(p(x_i|\theta))$$

Since  $\mathbf{r}_{L,i}$  is context-independent, let us denote the likelihood decoder output  $g_L(\mathbf{r}_{L,i}^c) = g_L(\mathbf{r}_{L,i})$ . Since the ground truth context prior  $p^c(\theta)$  is provided to the likelihood decoder  $g_L$  as schematized in Fig. 2 with the likelihood decoder output  $g_L(\mathbf{r}_{L,i})$  and the corresponding context prior  $p^c(\theta)$ , the context-dependent decoded posterior distribution  $q_{L,i}^c(\theta)$  is given by:

$$q_{L,i}^c(\theta) = \eta_{L,i}^c \cdot g_L(\mathbf{r}_{L,i}) \cdot p^c(\theta), \text{ where } \eta_{L,i}^c \text{ is a normalization constant.}$$

The cross-entropy loss for data samples associated with  $x_i, c$ , i.e.  $H(p^c(\theta|x_i), q_{L,i}^c(\theta))$ , is minimized when:

$$\begin{aligned} q_{L,i}^{c*}(\theta) &= p^c(\theta|x_i) \\ \Rightarrow \eta_{L,i}^c \cdot g_L^*(\mathbf{r}_{L,i}) \cdot p^c(\theta) &= \frac{p(x_i|\theta) \cdot p^c(\theta)}{p(x_i)} \\ \Rightarrow g_L^*(\mathbf{r}_{L,i}) &= \alpha_{L,i}^c \cdot p(x_i|\theta), \text{ where } \alpha_{L,i}^c \text{ is a constant} \end{aligned} \quad (6)$$

That is, after training, the likelihood decoder output  $g_L(\mathbf{r}_{L,i})$  will converge to  $g_L^*(\mathbf{r}_{L,i}) \propto p(x_i|\theta)$  given enough samples.

To get the expected cross-entropy loss across the entire data set, we marginalizing over all  $x_i, c$ , and the expected cross-entropy loss for a perfect likelihood decoder can be evaluated as:

$$\begin{aligned} \mathbb{E}_{p(x_i,c)}[H(p^c(\theta|x_i), q_{L,i}^{c*}(\theta))] &= \mathbb{E}_{p(x_i,c)}[H(p^c(\theta|x_i)) + D_{\text{KL}}(p^c(\theta|x_i) || q_{L,i}^{c*}(\theta))] \\ &= \mathbb{E}_{p(x_i,c)}[H(p^c(\theta|x_i))] \\ &= \sum_{x_i,c} H(p^c(\theta|x_i)) \cdot p(x_i, c) \\ &= \sum_{x_i,c} H(p^c(\theta|x_i)) \cdot p(c) \left[ \sum_{\theta} p(x_i|\theta) p^c(\theta) \right] \\ &= \sum_{x_i} \sum_c H(p^c(\theta|x_i)) \cdot p(c) \left[ \sum_{\theta} p(x_i|\theta) p^c(\theta) \right] \\ &= \sum_{x_i} \left\{ H(p^A(\theta|x_i)) \cdot p(c=A) \left[ \sum_{\theta} p(x_i|\theta) p^A(\theta) \right] + \right. \\ &\quad \left. H(p^B(\theta|x_i)) \cdot p(c=B) \left[ \sum_{\theta} p(x_i|\theta) p^B(\theta) \right] \right\} \end{aligned} \quad (7)$$

where the second equality holds because  $D_{\text{KL}}(p^c(\theta|x_i) || q_{L,i}^{c*}(\theta)) = 0$  for a perfect likelihood decoder as derived above. That is, the expected cross-entropy loss for a perfect likelihood decoder should approach the expected posterior entropy as determined by the context frequencies and context prior distributions as given by Eq. 7.



### Decoding performance of the best possible posterior decoder $g_P$

Applying a posterior decoder  $g_P$  to a likelihood coding population  $\mathbf{r}_L$ , we want:

$$g_P(\mathbf{r}_L) \longrightarrow p^c(\theta|x)$$

However, since there is no context information encoded in the population responses  $\mathbf{r}_L$ , the posterior decoder  $g_P$  cannot achieve the same performance as the likelihood decoder in Eq. 7, as there are scenarios where identical inputs ( $\mathbf{r}_{L,i}$ ) are trained to map to different outputs ( $p^c(\theta|x_i)$ ) depending on the inaccessible ground-truth context information  $p^c(\theta)$ .

Let us consider the neural population responses associated with each observation  $x_i$ :

$$\forall x_i, c : \mathbf{r}_{L,i}^c = \mathbf{r}_{L,i} \sim f(p(x_i|\theta))$$

The frequency of a context given the observation of data samples associated with  $x_i$  is given by:

$$\begin{aligned} p(c|x = x_i) &= \frac{p(c, x_i)}{p(x_i)} \\ &= \frac{p(c) \cdot p(x_i|c)}{\sum_{c'} p(c') \cdot p(x_i|c')} \\ &= \frac{p(c) \cdot \sum_{\theta} p^c(\theta) \cdot p(x_i|\theta)}{\sum_{c'} p(c') \sum_{\theta} p^{c'}(\theta) \cdot p(x_i|\theta)} \end{aligned}$$

Let us denote

$$\begin{aligned} S_i^A &:= p(c = A) \sum_{\theta} p^A(\theta) p(x_i|\theta) \\ S_i^B &:= p(c = B) \sum_{\theta} p^B(\theta) p(x_i|\theta) \end{aligned}$$

Hence, we can define the observation-dependent context frequency for a given  $x_i$  as:

$$\begin{aligned} \rho_i^A &:= p(c = A|x = x_i) = S_i^A / (S_i^A + S_i^B) \\ \rho_i^B &:= p(c = B|x = x_i) = S_i^B / (S_i^A + S_i^B) \end{aligned}$$

Now, let us denote the posterior decoder output  $q_{P,i}(\theta) := g_P(\mathbf{r}_{L,i})$ , highlighting that the output can be interpreted directly as the posterior distribution over the hidden state  $\theta$ , as schematized in Fig. 2. Since the posterior decoder output is agnostic to the specific context and the associated prior  $p^c(\theta)$ , under cross-entropy loss,  $q_{P,i}(\theta)$  is trained to minimize the expression below:

$$\begin{aligned} &\min_{q_{P,i}(\theta)} \left\{ \mathbb{E}_{p(c|x_i)} [H(p^c(\theta|x_i), q_{P,i}(\theta))] \right\} \\ &= \min_{q_{P,i}(\theta)} \left\{ \rho_i^A H(p^A(\theta|x_i), q_{P,i}(\theta)) + \rho_i^B H(p^B(\theta|x_i), q_{P,i}(\theta)) \right\} \\ &= \min_{q_{P,i}(\theta)} \left\{ - \sum_{\theta} [\rho_i^A p^A(\theta|x_i) \cdot \log q_{P,i}(\theta) + \rho_i^B p^B(\theta|x_i) \cdot \log q_{P,i}(\theta)] \right\} \\ &= \min_{q_{P,i}(\theta)} \left\{ - \sum_{\theta} [\rho_i^A p^A(\theta|x_i) + \rho_i^B p^B(\theta|x_i)] \cdot \log q_{P,i}(\theta) \right\} \end{aligned}$$

Since  $p^A(\theta|x_i)$  and  $p^B(\theta|x_i)$  are both probability distributions over  $\theta$ , and  $\rho_i^A + \rho_i^B = 1$ , the expression  $\rho_i^A p^A(\theta|x_i) + \rho_i^B p^B(\theta|x_i)$  represents a proper probability distribution over  $\theta$ . Therefore the loss above is minimized when:

$$\begin{aligned} q_{P,i}^*(\theta) &= \rho_i^A p^A(\theta|x_i) + \rho_i^B p^B(\theta|x_i) \\ &= \frac{S_i^A}{S_i^A + S_i^B} \frac{p^A(\theta)p(x_i|\theta)}{\sum_{\theta} p^A(\theta)p(x_i|\theta)} + \frac{S_i^B}{S_i^A + S_i^B} \frac{p^B(\theta)p(x_i|\theta)}{\sum_{\theta} p^B(\theta)p(x_i|\theta)} \\ &= \frac{[p(c = A)p^A(\theta) + p(c = B)p^B(\theta)] \cdot p(x_i|\theta)}{S_i^A + S_i^B} \\ &= \frac{[p(c = A)p^A(\theta) + p(c = B)p^B(\theta)] \cdot p(x_i|\theta)}{\sum_{\theta'} \{[p(c = A)p^A(\theta') + p(c = B)p^B(\theta')] \cdot p(x_i|\theta')\}} \end{aligned}$$

That is, after training, the best possible posterior decoder output for data samples associated with  $x_i$ , i.e.  $q_{P,i}^*(\theta)$ , is as if the decoder were to use a surrogate prior:

$$\tilde{p}_i(\theta) = p(c = A)p^A(\theta) + p(c = B)p^B(\theta) \quad (8)$$

which is the task-marginalized, Bayes-optimal estimator of the prior distributions over  $\theta$  across contexts  $c \in \{A, B\}$ . Interestingly, this surrogate prior distribution is independent of  $x_i$ .

Since likelihood-coding populations  $\mathbf{r}_L$  contain no prior information  $p^c(\theta)$ , a posterior decoder  $g_P$  trained on such population responses cannot perfectly decode the posterior distribution. Instead, the posterior decoder output converges to a Bayes-optimal estimate of context-dependent posteriors determined by the context distributions  $p(c)$  and  $p^c(\theta)$ . To obtain the expected cross-entropy loss across the entire data set, we marginalize over all  $x_i, c$ , yielding:

$$\begin{aligned} \mathbb{E}_{p(x_i, c)}[H(p^c(\theta|x_i), q_{P,i}^*(\theta))] &= \mathbb{E}_{p(x_i, c)}[H(p^c(\theta|x_i)) + D_{\text{KL}}(p^c(\theta|x_i) \parallel q_{P,i}^*(\theta))] \\ &= \mathbb{E}_{p(x_i, c)}[H(p^c(\theta|x_i))] + \mathbb{E}_{p(x_i, c)}[D_{\text{KL}}(p^c(\theta|x_i) \parallel q_{P,i}^*(\theta))] \\ &= \text{CE loss of the perfect likelihood decoder (Eq. 7)} \\ &\quad + \mathbb{E}_{p(x_i, c)}[D_{\text{KL}}(p^c(\theta|x_i) \parallel q_{P,i}^*(\theta))] \end{aligned} \quad (9)$$

#### Information gap for a likelihood coding population $\Delta_L^{\text{info}}$

From Eq. 9, let us define  $\Delta_L^{\text{info}}$ , the information gap between a perfect likelihood decoder ( $g_L^*$ ) and the best possible posterior decoder ( $g_P^*$ ) applied on a likelihood-coding population, evaluated as the expected difference in cross-entropy loss between the two decoders:

$$\begin{aligned} \Delta_L^{\text{info}} &:= \mathbb{E}_{p(x_i, c)}[D_{\text{KL}}(p^c(\theta|x_i) \parallel q_{P,i}^*(\theta))] \\ &= \sum_{x_i, c} D_{\text{KL}}(p^c(\theta|x_i) \parallel q_{P,i}^*(\theta)) \cdot p(x_i, c) \\ &= \sum_{x_i, c} D_{\text{KL}}(p^c(\theta|x_i) \parallel q_{P,i}^*(\theta)) \cdot p(c) \left[ \sum_{\theta} p(x_i|\theta)p^c(\theta) \right] \\ &= \sum_{x_i} \sum_c D_{\text{KL}}(p^c(\theta|x_i) \parallel q_{P,i}^*(\theta)) \cdot p(c) \left[ \sum_{\theta} p(x_i|\theta)p^c(\theta) \right] \\ &= \sum_{x_i} \left\{ D_{\text{KL}}(p^A(\theta|x_i) \parallel q_{P,i}^*(\theta)) \cdot p(c = A) \left[ \sum_{\theta} p(x_i|\theta)p^A(\theta) \right] + \right. \\ &\quad \left. D_{\text{KL}}(p^B(\theta|x_i) \parallel q_{P,i}^*(\theta)) \cdot p(c = B) \left[ \sum_{\theta} p(x_i|\theta)p^B(\theta) \right] \right\} \end{aligned} \quad (10)$$

Eq. 10 provides an analytical expression for the information gap for a likelihood-coding population under a task design specified by  $(p(c), p^c(\theta))$  and a generative model  $p(x|\theta)$ . Per observation  $x_i$ , the expression evaluates the KL divergence between the true posterior  $p^c(\theta|x_i)$  and a surrogate posterior  $q_{P,i}^*(\theta)$ , which is the output of the best possible posterior decoder utilizing the task-marginalized, Bayes-optimal estimator of the prior distribution (Eq. 8). The KL divergence is then marginalized across  $x_i$  to derive the total expected performance difference between likelihood decoders and posterior decoders.

#### A.1.2 INFORMATION GAP FOR POSTERIOR CODING HYPOTHESIS $\Delta_P^{\text{INFO}}$

For a posterior coding population, the neural population responses  $\mathbf{r}_P^c$  encode the posterior distribution over  $\theta$  given  $x$  under the context  $c$ , i.e.  $p^c(\theta|x)$ , and are therefore modulated by and dependent on the context prior  $p^c(\theta)$ :

$$\mathbf{r}_P^c \sim f(p^c(\theta|x)), \text{ where } f \text{ is some neural encoding function.}$$

#### Decoding performance of a perfect posterior decoder $g_P$

Applying a posterior decoder  $g_P$  to a posterior-coding population  $\mathbf{r}_P$ , we want

$$g_P(\mathbf{r}_P) \longrightarrow p^c(\theta|x)$$

As before, let us assume the observation space can be discretized into  $x \in \{x_i\}$ , and consider the neural population responses associated with each  $x_i$ :

$$\forall x_i, c : \mathbf{r}_{P,i}^c \sim f(p^c(\theta|x_i))$$

We denote the output of a posterior decoder as  $q_{P,i}^c(\theta) := g_P(\mathbf{r}_{P,i}^c)$ , which is context-dependent as  $\mathbf{r}_{P,i}^c$  depends on the context  $c$ . As the output of the posterior decoder  $q_{P,i}^c(\theta)$  can be directly interpreted as the posterior distribution (schematized in Fig. 2), the cross-entropy loss for data samples associated with  $x_i, c$ , i.e.  $H(p^c(\theta|x_i), q_{P,i}^c(\theta))$ , is minimized when:

$$q_{P,i}^{c*}(\theta) = p^c(\theta|x_i)$$

That is, after training, the posterior decoder output  $g_P(\mathbf{r}_{P,i}^c)$  will converge to  $q_{P,i}^{c*}(\theta) = p^c(\theta|x_i)$ , provided sufficient training samples are available.

To obtain the expected cross-entropy loss across the entire data set, we marginalize over all  $x_i, c$ , yielding:

$$\begin{aligned} \mathbb{E}_{p(x_i, c)}[H(p^c(\theta|x_i), q_{P,i}^{c*}(\theta))] &= \mathbb{E}_{p(x_i, c)}[H(p^c(\theta|x_i)) + D_{\text{KL}}(p^c(\theta|x_i) \parallel q_{P,i}^{c*}(\theta))] \\ &= \mathbb{E}_{p(x_i, c)}[H(p^c(\theta|x_i))] \\ &= \sum_{x_i, c} H(p^c(\theta|x_i)) \cdot p(x_i, c) \\ &= \sum_{x_i, c} H(p^c(\theta|x_i)) \cdot p(c) \left[ \sum_{\theta} p(x_i|\theta) p^c(\theta) \right] \\ &= \sum_{x_i} \sum_c H(p^c(\theta|x_i)) \cdot p(c) \left[ \sum_{\theta} p(x_i|\theta) p^c(\theta) \right] \\ &= \sum_{x_i} \left\{ H(p^A(\theta|x_i)) \cdot p(c=A) \left[ \sum_{\theta} p(x_i|\theta) p^A(\theta) \right] + \right. \\ &\quad \left. H(p^B(\theta|x_i)) \cdot p(c=B) \left[ \sum_{\theta} p(x_i|\theta) p^B(\theta) \right] \right\} \quad (11) \end{aligned}$$

where the second equality holds because  $D_{\text{KL}}(p^c(\theta|x_i) \parallel q_{P,i}^{c*}(\theta)) = 0$  for a perfect posterior decoder as derived above. Hence, the expected cross-entropy loss for a perfect posterior decoder on a posterior coding population should approach the expected posterior entropy as determined by the context frequencies and context prior distribution as given by Eq. 11. Note Eq. 11 is the same as the expected cross-entropy loss for a perfect likelihood decoder on a likelihood coding population as derived previously in Eq. 7.

### Decoding performance of the best possible likelihood decoder $g_L$

Applying a likelihood decoder  $g_L$  to a posterior coding population  $\mathbf{r}_P$ , we want

$$g_L(\mathbf{r}_P) \longrightarrow p(x|\theta)$$

In contrast to the mismatched decoding scenario of applying a posterior decoder to a likelihood-coding population where the posterior decoder cannot perfectly decode the posterior distributions from population responses for *any* observation  $x_i$ , application of a likelihood decoder to a posterior-coding population requires more intricate considerations—we reason below that only *some*  $x_i$  would cause the likelihood decoder to fail to perfectly decode the likelihood function from a posterior-coding population. We first reiterate that the posterior population responses  $\mathbf{r}_P^c$  are context dependent, which means that for the same  $x_i$ , the neural responses  $\mathbf{r}_{P,i}^c$  are different across the two contexts. Hence, from the perspective of a likelihood decoder, for each  $x_i$ , the inputs (neural responses  $\mathbf{r}_{P,i}^c$ ) are different across contexts, but the target output ( $p(x_i|\theta)$ ) is the same. Because the ground-truth context priors  $p^c(\theta)$  are explicitly provided to the likelihood decoder, this scenario “pressures”

the decoder to learn a *many-to-one* mapping, which is generally achievable for a sufficiently powerful likelihood decoder (Fig. 2C).

To identify the condition in which the likelihood decoder would fail to perfectly decode the likelihood function from posterior coding population responses, recall that when applying a posterior decoder to a likelihood-coding population, the main reason why the posterior decoder cannot be perfect is that it is forced to map identical inputs ( $\mathbf{r}_{L,i}$ ) into multiple distinct target outputs ( $p^c(\theta|x_i)$ ). In other words, the decoder cannot be perfect because it is trying to learn a *one-to-many* mapping. Given this insight, for the scenario of applying a likelihood decoder on a posterior-coding population, we identify the condition under which likelihood decoders are forced to map identical inputs to distinct target outputs. Consider the set of pairs  $\chi := \{(x_j, x_k)\}$ , where each pair  $(x_j, x_k)$  satisfies:

$$\begin{aligned} \mathbf{r}_{P,j}^A &\approx \mathbf{r}_{P,k}^B \\ \Leftrightarrow p^A(\theta|x_j) &\approx p^B(\theta|x_k), \forall \theta \quad (\text{can be measured in terms of KL divergence}) \\ \Leftrightarrow p^A(\theta) \cdot p(x_j|\theta) &\propto p^B(\theta) \cdot p(x_k|\theta), \forall \theta \end{aligned} \quad (12)$$

That is, we consider the condition  $\mathbf{r}_{P,j}^A \approx \mathbf{r}_{P,k}^B$ , where the inputs ( $\mathbf{r}_{P,j}^A$  or  $\mathbf{r}_{P,k}^B$ ) to the likelihood decoder  $g_L$  are (approximately) the same but the target output differs based on the context ( $p(x_j|\theta)$  or  $p(x_k|\theta)$ ). Under the assumption of ideal decoders, the set of pairs in  $\chi = \{(x_j, x_k)\}$  are the only scenarios where it is impossible for an ideal likelihood decoder to be perfect. In these scenarios, identical inputs (population responses encoding the same posterior distributions) need to be decoded into different outputs (distinct likelihood functions), which is not achievable by any functional decoder, regardless of training sample size or expressive of parametrization.

With the insight that only observations in the set of pairs  $\chi = (x_j, x_k)$  where Eq. 12 is satisfied will cause the likelihood decoder to fail to perfectly decode the likelihood function, let us now derive the expected likelihood decoder output for each pair. Firstly, consider the frequency of a context given an observation of neural responses associated with  $\mathbf{r}_{P,j}^A$  or  $\mathbf{r}_{P,k}^B$ :

$$\begin{aligned} p(c = A | \mathbf{r} = \mathbf{r}_{P,j}^A \vee \mathbf{r}_{P,k}^B) &= \frac{p(c = A, \mathbf{r} = \mathbf{r}_{P,j}^A \vee \mathbf{r}_{P,k}^B)}{p(\mathbf{r} = \mathbf{r}_{P,j}^A \vee \mathbf{r}_{P,k}^B)} \\ &= \frac{p(c = A) \cdot \sum_{\theta} p^A(\theta) p(x_j|\theta)}{p(c = A) \cdot \sum_{\theta} p^A(\theta) p(x_j|\theta) + p(c = B) \cdot \sum_{\theta} p^B(\theta) p(x_k|\theta)} \end{aligned}$$

Similarly, we have:

$$p(c = B | \mathbf{r} = \mathbf{r}_{P,j}^A \vee \mathbf{r}_{P,k}^B) = \frac{p(c = B) \cdot \sum_{\theta} p^B(\theta) p(x_k|\theta)}{p(c = A) \cdot \sum_{\theta} p^A(\theta) p(x_j|\theta) + p(c = B) \cdot \sum_{\theta} p^B(\theta) p(x_k|\theta)}$$

Let us denote

$$\begin{aligned} S_j^A &:= p(c = A) \sum_{\theta} p^A(\theta) p(x_j|\theta) \\ S_k^B &:= p(c = B) \sum_{\theta} p^B(\theta) p(x_k|\theta) \end{aligned}$$

Define the observation-dependent context frequency for observing data samples coming from  $\mathbf{r}_{P,j}^A$  or  $\mathbf{r}_{P,k}^B$ :

$$\begin{aligned} \rho_j^A &:= p(c = A | \mathbf{r} = \mathbf{r}_{P,j}^A \vee \mathbf{r}_{P,k}^B) = S_j^A / (S_j^A + S_k^B) \\ \rho_k^B &:= p(c = B | \mathbf{r} = \mathbf{r}_{P,j}^A \vee \mathbf{r}_{P,k}^B) = S_k^B / (S_j^A + S_k^B) \end{aligned}$$

Now, let us denote the context-independent likelihood decoder output as  $\ell_{jk}(\theta) := g_L(\mathbf{r} = \mathbf{r}_{P,j}^A \vee \mathbf{r}_{P,k}^B)$ . The context-dependent posterior distribution given the corresponding context prior  $p^c(\theta)$  is

given by:

$$q_{L,j}^A(\theta) = \frac{p^A(\theta)\ell_{jk}(\theta)}{\sum_{\theta'} p^A(\theta')\ell_{jk}(\theta')} = \frac{p^A(\theta)\ell_{jk}(\theta)}{Z_j^A[\ell_{jk}(\theta)]}$$

$$q_{L,k}^B(\theta) = \frac{p^B(\theta)\ell_{jk}(\theta)}{\sum_{\theta'} p^B(\theta')\ell_{jk}(\theta')} = \frac{p^B(\theta)\ell_{jk}(\theta)}{Z_k^B[\ell_{jk}(\theta)]}$$

where  $Z_j^A[\ell_{jk}(\theta)]$  and  $Z_k^B[\ell_{jk}(\theta)]$  are normalization constants dependent on  $\ell_{jk}(\theta)$ , defined as:

$$Z_j^A[\ell_{jk}(\theta)] := \sum_{\theta} p^A(\theta)\ell_{jk}(\theta)$$

$$Z_k^B[\ell_{jk}(\theta)] := \sum_{\theta} p^B(\theta)\ell_{jk}(\theta)$$

Under cross-entropy loss, we want  $\ell_{jk}(\theta)$  (and hence its associated posteriors  $q_{L,j}^A(\theta)$  and  $q_{L,k}^B(\theta)$ ) to minimize:

$$\begin{aligned} & \min_{\ell_{jk}(\theta)} \left\{ \rho_j^A H(p^A(\theta|x_j), q_{L,j}^A(\theta)) + \rho_k^B H(p^B(\theta|x_k), q_{L,k}^B(\theta)) \right\} \\ &= \min_{\ell_{jk}(\theta)} \left\{ - \sum_{\theta} \left[ \rho_j^A p^A(\theta|x_j) \log q_{L,j}^A(\theta) + \rho_k^B p^B(\theta|x_k) \log q_{L,k}^B(\theta) \right] \right\} \\ &= \min_{\ell_{jk}(\theta)} \left\{ - \sum_{\theta} \left[ \rho_j^A \frac{p^A(\theta)p(x_j|\theta)}{\sum_{\theta'} p^A(\theta')p(x_j|\theta')} \log \frac{p^A(\theta)\ell_{jk}(\theta)}{Z_j^A[\ell_{jk}]} + \right. \right. \\ & \quad \left. \left. \rho_k^B \frac{p^B(\theta)p(x_k|\theta)}{\sum_{\theta'} p^B(\theta')p(x_k|\theta')} \log \frac{p^B(\theta)\ell_{jk}(\theta)}{Z_k^B[\ell_{jk}]} \right] \right\} \end{aligned} \quad (13)$$

Define

$$\mu_j^A(\theta) := \rho_j^A p^A(\theta|x_j) = \rho_j^A \frac{p^A(\theta)p(x_j|\theta)}{\sum_{\theta'} p^A(\theta')p(x_j|\theta')} = \frac{p(c=A)p^A(\theta)p(x_j|\theta)}{S_j^A + S_k^B}$$

$$\mu_k^B(\theta) := \rho_k^B p^B(\theta|x_k) = \rho_k^B \frac{p^B(\theta)p(x_k|\theta)}{\sum_{\theta'} p^B(\theta')p(x_k|\theta')} = \frac{p(c=B)p^B(\theta)p(x_k|\theta)}{S_j^A + S_k^B}$$

Note

$$\sum_{\theta} \mu_j^A(\theta) = \frac{p(c=A) \sum_{\theta} p^A(\theta)p(x_j|\theta)}{S_j^A + S_k^B} = \rho_j^A$$

$$\sum_{\theta} \mu_k^B(\theta) = \frac{p(c=B) \sum_{\theta} p^B(\theta)p(x_k|\theta)}{S_j^A + S_k^B} = \rho_k^B$$

The cross-entropy loss term in Eq. 13 can be rewritten as:

$$\begin{aligned} L(\ell_{jk}(\theta)) &= - \sum_{\theta} \left[ \mu_j^A(\theta) \cdot \left( \log p^A(\theta) + \log \ell_{jk}(\theta) - \log Z_j^A[\ell_{jk}(\theta)] \right) + \right. \\ & \quad \left. \mu_k^B(\theta) \cdot \left( \log p^B(\theta) + \log \ell_{jk}(\theta) - \log Z_k^B[\ell_{jk}(\theta)] \right) \right] \\ &= - \left\{ \sum_{\theta} \left[ \mu_j^A(\theta) \log p^A(\theta) + \mu_k^B(\theta) \log p^B(\theta) \right] \right. \\ & \quad \left. + \sum_{\theta} \left[ (\mu_j^A(\theta) + \mu_k^B(\theta)) \cdot \log \ell_{jk}(\theta) \right] \right. \\ & \quad \left. - \left[ \sum_{\theta} \mu_j^A(\theta) \right] \cdot \log Z_j^A[\ell_{jk}(\theta)] - \left[ \sum_{\theta} \mu_k^B(\theta) \right] \cdot \log Z_k^B[\ell_{jk}(\theta)] \right\} \end{aligned} \quad (14)$$

Note from Eq. 14, we can see that  $L(\alpha\ell) = L(\ell)$ ,  $\forall \alpha > 0$ , as the normalization factors cancel out the multiplicative effect. Therefore  $\ell^*$  that minimizes  $L$  is determined up to a multiplicative constant, agreeing with our intuition that the output of a likelihood decoder should be only determined up to a multiplicative constant as in Eq. 6.

The above minimization happens at the critical point  $\ell_{jk}^*(\theta)$  where  $\frac{\partial L}{\partial \ell_{jk}^*(\theta)} = 0$ ,  $\forall \theta$ , with  $L$  defined in Eq. 14.

Before proceeding to find the minimum for this variational calculus problem, let us first evaluate:

$$\begin{aligned}\frac{\partial}{\partial \ell_{jk}(\theta)} Z_j^A[\ell_{jk}(\theta)] &= \frac{\partial}{\partial \ell_{jk}(\theta)} \left\{ \sum_{\theta'} p^A(\theta') \ell_{jk}(\theta') \right\} = p^A(\theta) \\ \frac{\partial}{\partial \ell_{jk}(\theta)} Z_k^B[\ell_{jk}(\theta)] &= \frac{\partial}{\partial \ell_{jk}(\theta)} \left\{ \sum_{\theta'} p^B(\theta') \ell_{jk}(\theta') \right\} = p^B(\theta)\end{aligned}$$

To find the minimum, let us take the derivative of  $L$  with respect to  $\ell_{jk}(\theta)$  and set it to zero:

$$\begin{aligned}0 &= \frac{\partial L(\ell_{jk}(\theta))}{\partial \ell_{jk}(\theta)} \\ &= -\frac{\partial}{\partial \ell_{jk}(\theta)} \left\{ \sum_{\theta} \left[ \mu_j^A(\theta) \log p^A(\theta) + \mu_k^B(\theta) \log p^B(\theta) \right] \right. \\ &\quad \left. + \sum_{\theta} \left[ (\mu_j^A(\theta) + \mu_k^B(\theta)) \cdot \log \ell_{jk}(\theta) \right] \right. \\ &\quad \left. - \left[ \sum_{\theta} \mu_j^A(\theta) \right] \cdot \log Z_j^A[\ell_{jk}(\theta)] - \left[ \sum_{\theta} \mu_k^B(\theta) \right] \cdot \log Z_k^B[\ell_{jk}(\theta)] \right\} \\ &= -\left\{ \frac{\mu_j^A(\theta) + \mu_k^B(\theta)}{\ell_{jk}(\theta)} - \frac{\left[ \sum_{\theta} \mu_j^A(\theta) \right]}{Z_j^A[\ell_{jk}(\theta)]} \frac{\partial Z_j^A[\ell_{jk}(\theta)]}{\partial \ell_{jk}(\theta)} - \frac{\left[ \sum_{\theta} \mu_k^B(\theta) \right]}{Z_k^B[\ell_{jk}(\theta)]} \frac{\partial Z_k^B[\ell_{jk}(\theta)]}{\partial \ell_{jk}(\theta)} \right\} \\ &= -\left\{ \frac{\mu_j^A(\theta) + \mu_k^B(\theta)}{\ell_{jk}(\theta)} - \frac{\rho_j^A}{Z_j^A[\ell_{jk}(\theta)]} p^A(\theta) - \frac{\rho_k^B}{Z_k^B[\ell_{jk}(\theta)]} p^B(\theta) \right\}\end{aligned}$$

Therefore the minimization happens when (determined up to a multiplicative constant):

$$\begin{aligned}\ell_{jk}^*(\theta) &\propto \frac{\mu_j^A(\theta) + \mu_k^B(\theta)}{\frac{\rho_j^A}{Z_j^A[\ell_{jk}^*]} p^A(\theta) + \frac{\rho_k^B}{Z_k^B[\ell_{jk}^*]} p^B(\theta)} \\ &= \frac{\rho_j^A p^A(\theta|x_j) + \rho_k^B p^B(\theta|x_k)}{\frac{\rho_j^A}{Z_j^A[\ell_{jk}^*]} p^A(\theta) + \frac{\rho_k^B}{Z_k^B[\ell_{jk}^*]} p^B(\theta)}\end{aligned}\tag{15}$$

Eq. 15 gives an implicit expression for  $\ell_{jk}^*(\theta)$ , since both  $Z_j^A[\ell_{jk}^*]$  and  $Z_k^B[\ell_{jk}^*]$  depend on  $\ell_{jk}^*(\theta)$ .

The equation can be solved using fixed-point iteration starting with some initial guess for  $\ell_{jk}^{(0)}(\theta) > 0$ . For instance:

Initialize  $\ell_{jk}^{(0)}(\theta) \propto 1$

for  $t = 0, 1, 2, \dots$ :

$$\text{compute } Z_j^{A,(t)}[\ell_{jk}^{(t)}] = \sum_{\theta} \ell_{jk}^{(t)}(\theta) p^A(\theta)$$

$$Z_k^{B,(t)}[\ell_{jk}^{(t)}] = \sum_{\theta} \ell_{jk}^{(t)}(\theta) p^B(\theta)$$

$$\text{update } \ell_{jk}^{(t+1)}(\theta) = \frac{\rho_j^A p^A(\theta|x_j) + \rho_k^B p^B(\theta|x_k)}{\frac{\rho_j^A}{Z_j^{A,(t)}[\ell_{jk}^{(t)}]} p^A(\theta) + \frac{\rho_k^B}{Z_k^{B,(t)}[\ell_{jk}^{(t)}]} p^B(\theta)}$$

Stop when  $\ell_{jk}^{(t)}(\theta)$  converges (up to a multiplicative constant).

That is, as given by Eq. 15, after training, the best possible likelihood decoder output for data samples associated with  $\mathbf{r}_{P,j}^A$  and  $\mathbf{r}_{P,k}^B$  is as if the likelihood decoder were to divide a surrogate posterior that is a weighted sum of ground-truth posteriors  $\rho_j^A p^A(\theta|x_j) + \rho_k^B p^B(\theta|x_k)$  by a surrogate prior that is a weighted sum of ground-truth priors  $\frac{\rho_j^A}{Z_j^A[\ell_{jk}^*]} p^A(\theta) + \frac{\rho_k^B}{Z_k^B[\ell_{jk}^*]} p^B(\theta)$ .

The posterior of the best possible likelihood decoder output  $g_L^* = \ell_{jk}^*(\theta)$  given the corresponding context prior for  $\mathbf{r}_{P,j}^A$  and  $\mathbf{r}_{P,k}^B$  is evaluated as:

$$q_{L,j}^{A*}(\theta) = \frac{\ell_{jk}^*(\theta) p^A(\theta)}{Z_j^A[\ell_{jk}^*]}$$

$$q_{L,k}^{B*}(\theta) = \frac{\ell_{jk}^*(\theta) p^B(\theta)}{Z_k^B[\ell_{jk}^*]}$$

Hence, to obtain the expected cross-entropy loss across the entire data set, we marginalize over all  $x_i, c$ , and the total cross-entropy loss for the best possible likelihood decoder can be expressed as:

$$\begin{aligned} \mathbb{E}_{p(x_i,c)}[H(p^c(\theta|x_i), q_{L,i}^{c*}(\theta))] &= \mathbb{E}_{p(x_i,c)}[H(p^c(\theta|x_i)) + D_{\text{KL}}(p^c(\theta|x_i) \parallel q_{L,i}^{c*}(\theta))] \\ &= \mathbb{E}_{p(x_i,c)}[H(p^c(\theta|x_i))] + \mathbb{E}_{p(x_i,c)}[D_{\text{KL}}(p^c(\theta|x_i) \parallel q_{L,i}^{c*}(\theta))] \\ &= \text{CE loss for the perfect posterior decoder (Eq. 11)} \\ &\quad + \mathbb{E}_{p(x_i,c)}[D_{\text{KL}}(p^c(\theta|x_i) \parallel q_{L,i}^{c*}(\theta))] \end{aligned} \quad (16)$$

#### Information gap for a posterior coding population $\Delta_P^{\text{info}}$

From equation 16, let us define  $\Delta_P^{\text{info}}$ , the information gap for a posterior coding population between a perfect posterior decoder ( $g_P^*$ ) and the best possible likelihood decoder ( $g_L^*$ ), as the expected difference in the cross-entropy loss of the two decoders:

$$\begin{aligned} \Delta_P^{\text{info}} &:= \mathbb{E}_{p(x_i,c)}[D_{\text{KL}}(p^c(\theta|x_i) \parallel q_{L,i}^{c*}(\theta))] \\ &= \sum_{x_i,c} D_{\text{KL}}(p^c(\theta|x_i) \parallel q_{L,i}^{c*}(\theta)) \cdot p(x_i, c), \text{ since only } x_i \in \chi = \{(x_j, x_k)\} \text{ terms are nonzero} \\ &= \sum_{x_i \in \chi, c} D_{\text{KL}}(p^c(\theta|x_i) \parallel q_{L,i}^{c*}(\theta)) \cdot p(x_i, c) \\ &= \sum_{x_i \in \chi, c} D_{\text{KL}}(p^c(\theta|x_i) \parallel q_{L,i}^{c*}(\theta)) \cdot p(c) \left[ \sum_{\theta} p(x_i|\theta) p^c(\theta) \right] \\ &= \sum_{x_i \in \chi} \sum_c D_{\text{KL}}(p^c(\theta|x_i) \parallel q_{L,i}^{c*}(\theta)) \cdot p(c) \left[ \sum_{\theta} p(x_i|\theta) p^c(\theta) \right] \\ &= \sum_{(x_j, x_k)} \left\{ D_{\text{KL}}(p^A(\theta|x_j) \parallel q_{L,j}^{A*}(\theta)) \cdot p(c=A) \left[ \sum_{\theta} p(x_j|\theta) p^A(\theta) \right] \right. \\ &\quad \left. + D_{\text{KL}}(p^B(\theta|x_k) \parallel q_{L,k}^{B*}(\theta)) \cdot p(c=B) \left[ \sum_{\theta} p(x_k|\theta) p^B(\theta) \right] \right\} \end{aligned} \quad (17)$$

Eq. 17 provides an analytical expression for the information gap for a posterior-coding population under a task design specified by  $(p(c), p^c(\theta))$  and a generative model  $p(x|\theta)$ . Per pair of observations  $(x_j, x_k)$ , we evaluate the KL divergence between the true posterior ( $p^A(\theta|x_j)$  or  $p^B(\theta|x_k)$ ) and a surrogate posterior ( $q_{L,j}^{A*}(\theta)$  or  $q_{L,k}^{B*}(\theta)$ ), which is the posterior distribution associated with the output of the best possible likelihood decoder utilizing the task-marginalized, Bayes-optimal estimators as given by Eq. 15. The KL divergence is then marginalized across the pairs  $(x_j, x_k)$  to derive the total expected performance difference between likelihood decoders and posterior decoders.



## A.2 DETAILS OF SIMULATION EXPERIMENT

### A.2.1 SIMULATED NEURAL POPULATIONS

We consider tasks with Gaussian context priors motivated by classic orientation discrimination psychophysical tasks (Orbán et al., 2016; Walker et al., 2020). In this task, subjects perform an orientation discrimination under two contexts  $c \in \{A, B\}$ , with the context for each session sampled randomly, i.e.  $p(c = A) = p(c = B) = 0.5$ . Within each session, the trial-to-trial hidden world state  $\theta$  (i.e. orientation) is drawn from context-specific Gaussian prior distributions  $p^c(\theta) = \mathcal{N}(\mu^c, (\sigma^c)^2)$ , where  $\mu^c$  and  $(\sigma^c)^2$  are task-specific parameters. In the simulation, we consider  $\theta \in \{-90^\circ, 90^\circ\}$ , and use identical variances for the two Gaussian priors  $\sigma^A = \sigma^B = \sigma$ . Consequently, the experimental design is fully specified by the tuple of task parameters  $(\mu^A, \mu^B, \sigma)$ . Furthermore, foregoing cardinal orientation consideration, the circular symmetry of orientations  $\theta$  suggests that only the separation between the two means  $d = |\mu^A - \mu^B|$  would meaningfully impact perception. Given this, we always center the two means around zero, meaning  $\mu^A = -\frac{1}{2}d$  and  $\mu^B = \frac{1}{2}d$ . We systematically vary  $(d, \sigma)$  to cover the task spectrum of Gaussian context priors in the simulation studies.

Noisy sensory observations  $x$  are drawn from the conditional distribution defined by the given generative model  $p(x|\theta)$ . This stochastic process can be seen as capturing both intrinsic neuronal noise and uncertainty in the extrinsic stimulus features. This generative model can be experimentally manipulated through stimulus parameters such as contrast, where lower contrast induces increased observation variance, reflecting increased sensory uncertainty. In the simulation,  $p(x|\theta)$  is modeled as Gaussian distributions to reflect Gaussian orientation tuning curves commonly found among simple V1 neurons. We model the effect of different contrast levels by systematically varying the standard deviation of the generative model  $\sigma_{\text{obs}}$  (Walker et al., 2020). To this end, standard deviations  $\sigma_{\text{obs}}$  of 8, 15, and 25 are chosen to model the generative model under high, medium, and low contrast levels, respectively. Finally, on each trial, the hidden world state  $\theta$  is drawn from  $p^c(\theta) = \mathcal{N}(\mu^c, (\sigma^c)^2)$  and then the observation is drawn from the conditional distribution  $p(x|\theta) = \mathcal{N}(\theta, \sigma_{\text{obs}}^2)$ .

For simulated population responses, we first implement Poisson neuron models with Gaussian tuning curves and Poisson variability (Walker et al., 2020). A population of neurons indexed by  $l$ , ranging from 5-500 neurons, was constructed with Gaussian tuning curves  $\mathcal{N}(\theta_l, \sigma_{\text{obs}}^2)$  with their means  $\theta_l$  tiling up the orientation space and their standard deviations being  $\sigma_{\text{obs}}$ . For likelihood-coding populations, the mean firing rate of each neuron on each trial, after an observation  $x$  is sampled, is

determined by the probability density of its Gaussian tuning curve, i.e.  $f(x) = \frac{1}{\sqrt{2\pi\sigma_{\text{obs}}^2}} e^{-\frac{(x-\theta_l)^2}{2\sigma_{\text{obs}}^2}}$ , scaled with a fixed constant of 30 to approximate the typical range of neuron firing rates observed experimentally (Walker et al., 2020). For posterior-coding populations, the mean firing rate of each neuron is further multiplied by the context-specific prior  $p^c(\theta)$ , thus effectively encoding the posterior  $p^c(\theta|x) \propto p(x|\theta) \cdot p^c(\theta)$  in their mean firing rates. For both populations, trial-to-trial spike counts are then generated by sampling from Poisson distribution with the specified mean firing rates.

For some simulation experiments, we additionally implemented a more complex, gain-modulated Poisson neuron model for simulating population responses (Goris et al., 2014). The gain-modulated Poisson neuron model has been proposed to account for the supra-Poisson variability commonly observed experimentally among V1 neurons. In this model, the mean firing rate of the neuron is the product of two terms: 1) the original rate determined by the Gaussian tuning curve model, and 2) a stimulus-independent gain factor  $G$ . Goris et al. (2014) proposed and validated on V1 neural data that this stimulus-independent gain factor  $G$  can be effectively modeled as following a gamma distribution with a mean of one and variance of  $\sigma_G^2$ . Based on their results, we choose a biologically realistic value of  $\sigma_G \approx 0.5$  in our simulation. Therefore, on a trial-to-trial basis, after an original rate is determined according to the procedure in the previous paragraph for the likelihood-coding or posterior-coding population, a random gain factor is then sampled from the gamma distribution and multiplied with the original rate to get the mean firing rate for the gain-modulated Poisson neuron model. Similarly, spike counts are then generated from the mean firing rates with Poisson variability.

### A.2.2 PROBABILISTIC INFORMATION DECODER

As described in Fig. 2C, deep neural networks parametrized by multi-layered perceptrons are trained with cross-entropy loss to serve as flexible, powerful decoders to decode either the likelihood func-



tion or the posterior distribution from simulated neural population responses (Walker et al., 2020). We use fully-connected, deep neural networks with two hidden layers, with 300 and 200 units in the first and second layer, respectively. All hidden units are rectified linear units, and dropout rates of 0.5 are used for both layers. The input dimension to the first layer is the number of neurons in the simulated population, ranging from 5–500. The output layer is a fully connected readout with no nonlinearity and a dimension of the number of possible hidden states. In our simulation, we consider orientation  $\theta \in \{-90^\circ, 90^\circ\}$  and discretize them into one degree bins, leading to a total number of possible hidden states of 181. To facilitate numerical stability, the decoded probability quantity is operating in the log space. The posterior decoder output is treated as the log-posterior, which is directly optimized to minimize the cross-entropy loss. The likelihood decoder output is treated as the log-likelihood, which is then integrated with the ground truth log-prior to arrive at the final output that is optimized to minimize the cross-entropy loss. To encourage smoothness of the decoded probability distributions, an  $L_2$  regularizer on the log-posteriors filtered with a Laplacian filter of the form  $h = [0.25, 0.5, 0.25]$  is added to the cross-entropy term, as proposed in (Walker et al., 2020). We use (0.8, 0.2) for train-validation split for training the decoders. A held-out test set is used to final evaluation and all results in the paper are on the test set. Early stop with patience of 10 and minimal change of  $2e-6$  in validation set cross-entropy loss is adopted to prevent overfitting. All models were constructed and trained using the Pytorch framework (Paszke et al., 2019).

### A.3 DETAILED RESULTS ON HEAVY-TAILED PRIORS

Below we first provide the full results of information gap landscape across various contrast levels for heavy-tailed context priors including student’s t-distribution (Fig. 8) and Cauchy distribution (Fig. 9). Note that for t-distribution we report the results using degrees of freedom  $\nu = 3$ . When  $\nu \rightarrow \infty$  the t-distribution reduces to a standard Gaussian distribution, and when  $\nu = 0$  the t-distribution becomes the Cauchy distribution. We then provide an intuitive example explaining why the information gap for posterior coding hypothesis is dramatically lower under heavy-tailed context priors compared to Gaussian context priors. The main reason is that under Gaussian generative models, when integrated with heavy-tailed priors, the posteriors tend to become asymmetric (as opposed to Gaussian priors where the posteriors are still symmetric Gaussian), thus limiting the number of pairs  $(x_j, x_k)$  that could confuse the likelihood decoder.

#### A.3.1 INFORMATION GAP LANDSCAPE

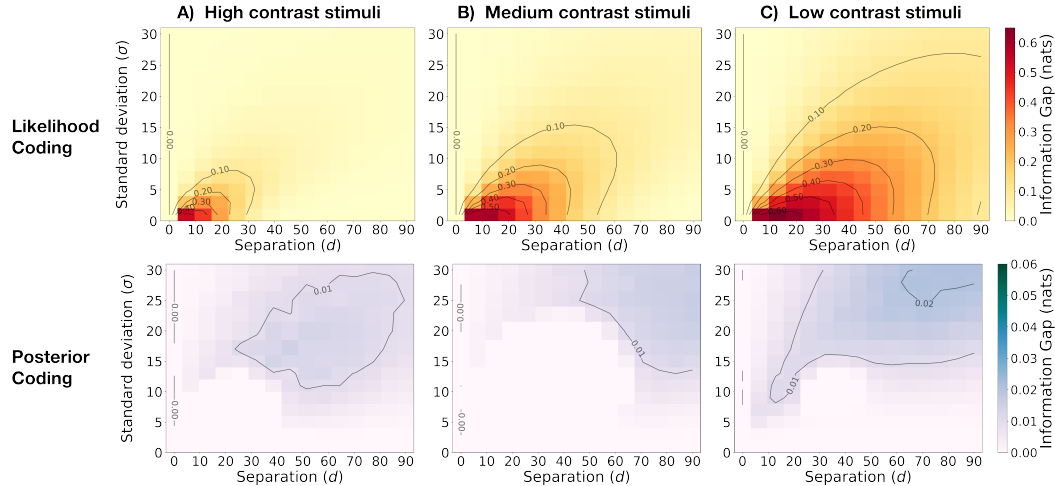

Figure 8: **Information gap landscapes when using student’s t-distribution with degrees of freedom  $\nu = 3$  as context priors.** A) Information gap as a function of task parameters ( $d$ : separation between context priors, and  $\sigma$ : context prior standard deviations) for both the likelihood coding hypothesis (top) and the posterior coding hypothesis (bottom) when presented with high contrast stimuli. B) Same for medium contrast stimuli and C) for low contrast stimuli.

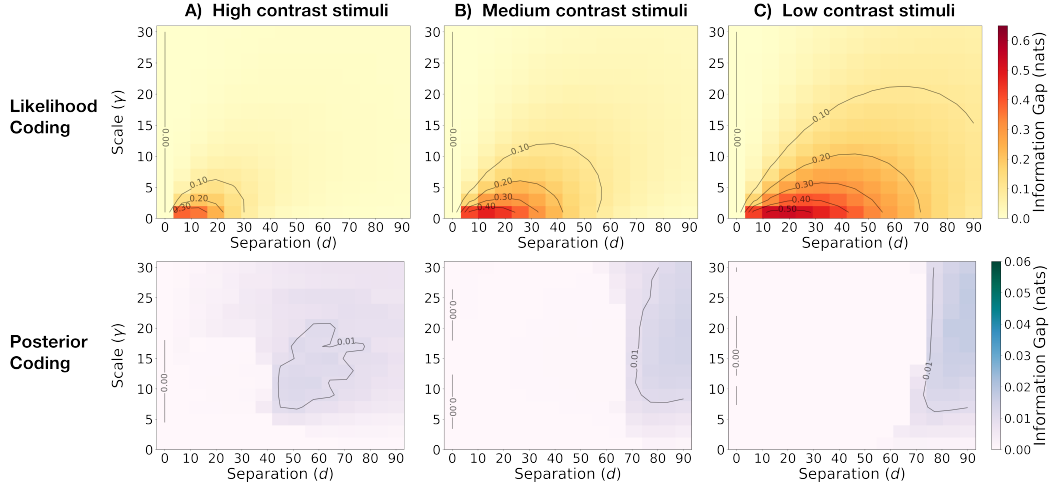

Figure 9: **Information gap landscapes when using Cauchy distribution as context priors.** A) Information gap as a function of task parameters ( $d$ : separation between context priors, and  $\gamma$ : context prior scales) for both the likelihood coding hypothesis (top) and the posterior coding hypothesis (bottom) when presented with high contrast stimuli. B) Same for medium contrast stimuli and C) for low contrast stimuli.

### A.3.2 AN EXAMPLE EXPLAINING WHY $\Delta_p^{\text{INFO}}$ IS DRAMATICALLY DECREASED UNDER HEAVY-TAILED CONTEXT PRIORS

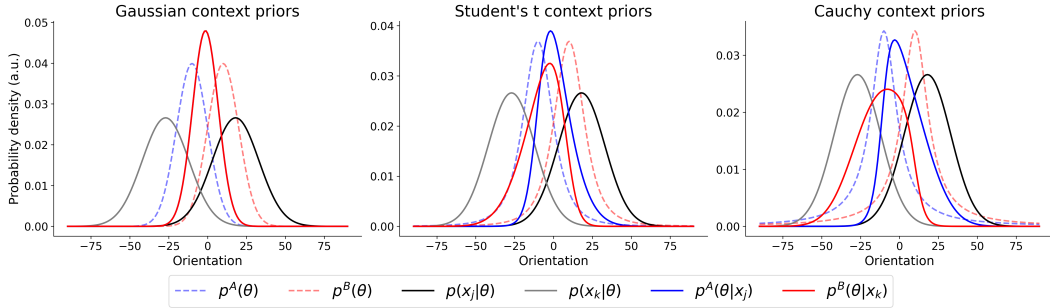

Figure 10: **Heavy tailed context priors, when integrated with Gaussian likelihood function, lead to asymmetric posterior distributions, limiting the pairs of identical posteriors satisfying Eq. 12 that would cause imperfect likelihood decoders on posterior-coding populations.** Across task designs with Gaussian context priors (left), student's t context priors with  $\nu = 3$  (middle), and Cauchy context priors (right), the context priors  $p^A(\theta)$  and  $p^B(\theta)$  are shown in dashed blue and red lines, respectively. Note they all share identical standard deviation or scale parameters to facilitate comparison. One example pair of  $(x_j, x_k) = (18^\circ, -27^\circ)$  that satisfies Eq. 12 under Gaussian context priors is shown here, with the associated likelihood functions  $p(x_j|\theta)$  and  $p(x_k|\theta)$  plotted in solid gray and black lines, respectively. The posterior distributions under each context priors,  $p^A(\theta|x_j)$  and  $p^B(\theta|x_k)$  are shown as solid blue and red lines, respectively. Under Gaussian context priors (left), the two posteriors are equal to each other, i.e.  $p^A(\theta|x_j) = p^B(\theta|x_k)$ , hence the two lines overlap. However, as the context priors become increasingly heavy-tailed as under student's t distribution (middle) and Cauchy distributions (right), the two posteriors become more and more asymmetric, leading to non-identical posterior distributions that no longer satisfy Eq. 12. This example demonstrates why there are much less pairs  $(x_j, x_k)$  that would satisfy Eq. 12 accounting for the observation that the information gap of posterior-coding population is dramatically decreased under heavy-tailed context priors.
